# Supplementary material for: Cancer-Associated Fibroblast Risk Model for Prediction of Colorectal Carcinoma Prognosis and Therapeutic Responses
Source: Hindawi journal article supplement (doi:10.1155/2023/3781091), 2023-04-25

**A**

**Module membership vs. gene significance**  
**cor=0.96, p<1e-200**

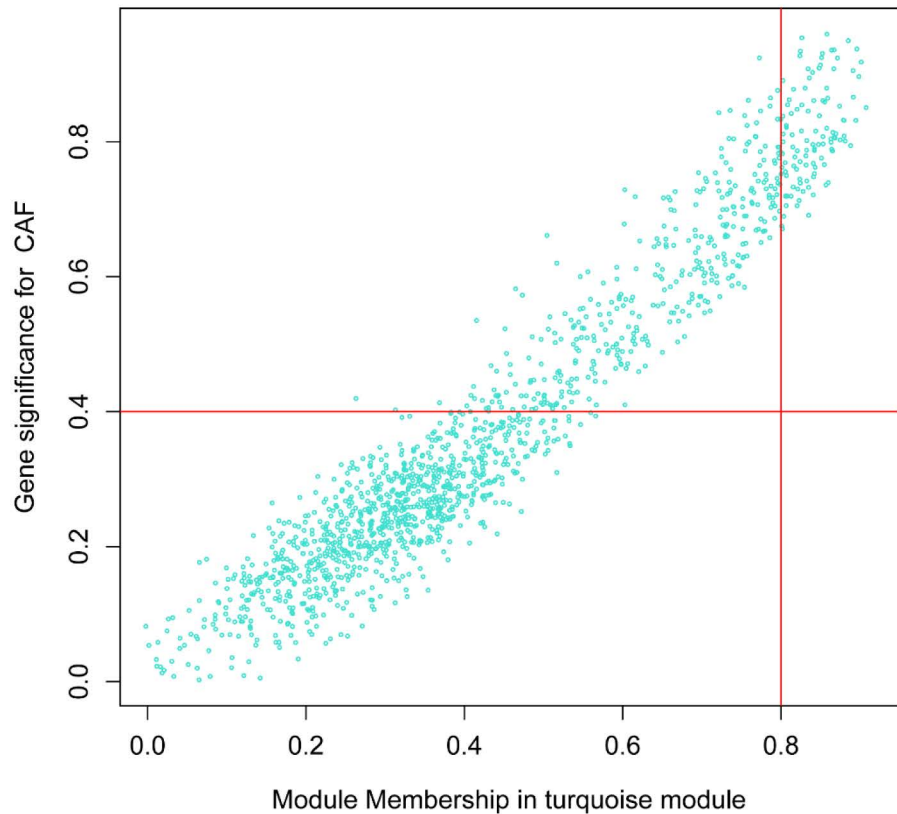**B**

**Module membership vs. gene significance**  
**cor=0.93, p<1e-200**

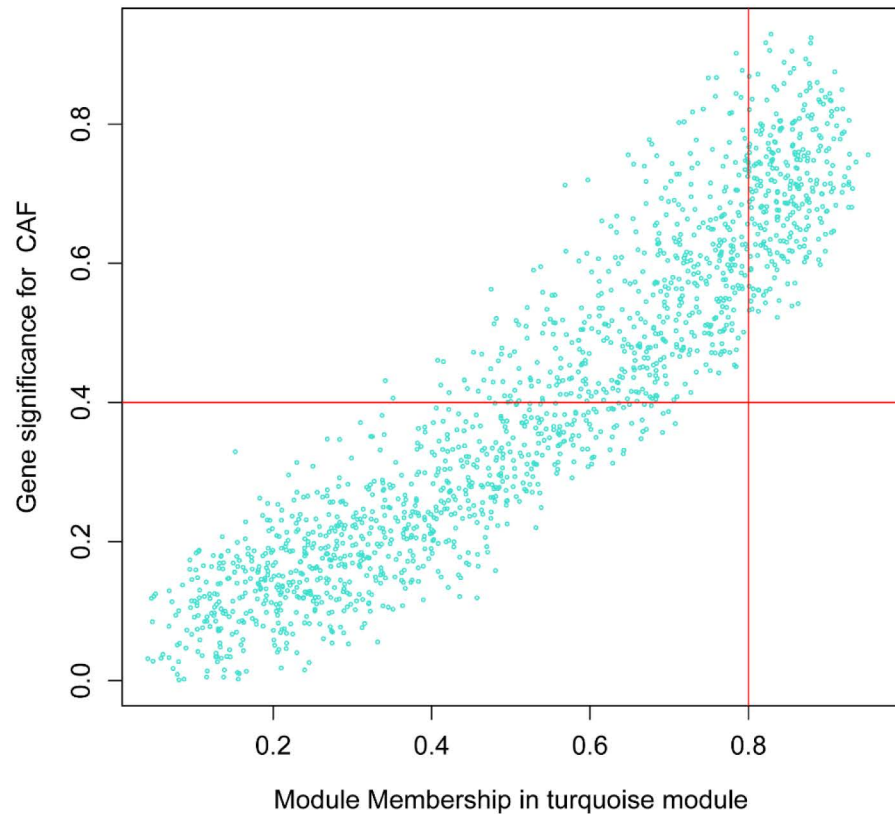

Supplement: f1 [file 3781091.f1.pdf]
