# Supplementary material for: Cancer-Associated Fibroblast Risk Model for Prediction of Colorectal Carcinoma Prognosis and Therapeutic Responses
Source: Hindawi journal article supplement (doi:10.1155/2023/3781091), 2023-04-25

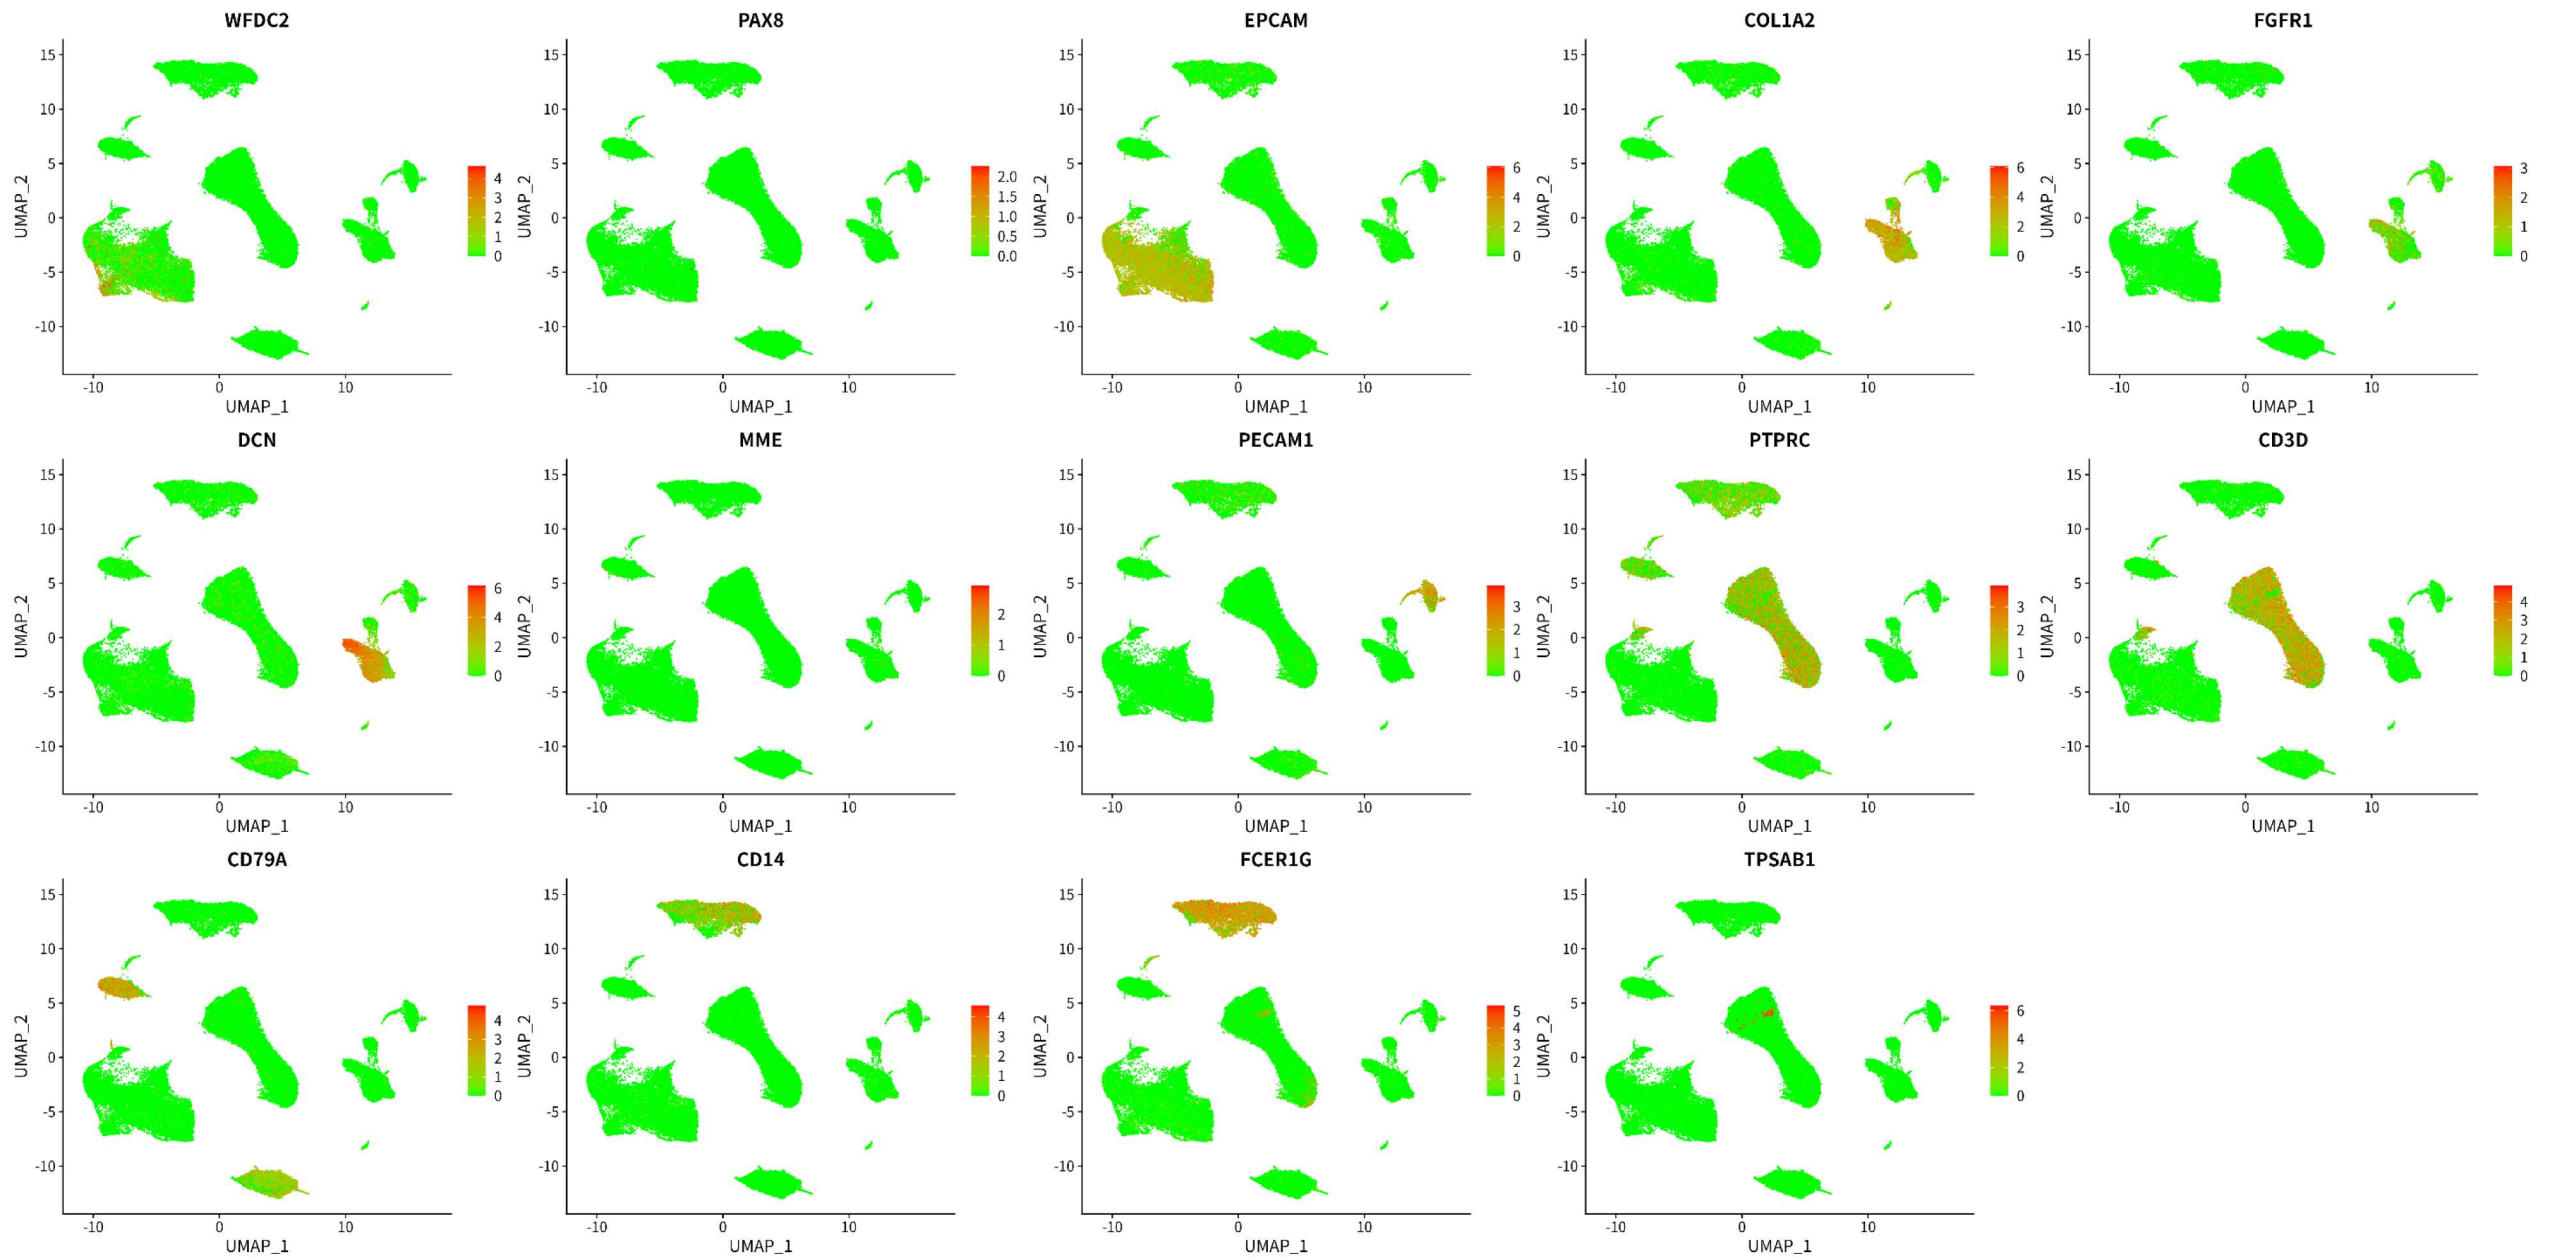

Supplement: f2 [file 3781091.f2.pdf]
