# Supplementary material for: Cancer-Associated Fibroblast Risk Model for Prediction of Colorectal Carcinoma Prognosis and Therapeutic Responses
Source: Hindawi journal article supplement (doi:10.1155/2023/3781091), 2023-04-25
Supplement: f3 [file 3781091.f3.pdf]

Table S1

| ID        | sequence (5' to 3')     |
|-----------|-------------------------|
| ZNF532-F  | GCGTTTAAGTCTGCCCAAG     |
| ZNF532-R  | GTGTTGGTCAAAGTGGCGAT    |
| COLEC12-F | GCATGGAAACATCTGCCAAA    |
| COLEC12-R | TCTGTAATCTCACGAAGTTGCTG |
| GAPDH-F   | ACAAC TTGGTATCGTGGAAGG  |
| GAPDH-R   | GCCATCACGCCACAGTTTC     |
